# Supplementary material for: Parallel Murine and Human Plaque Proteomics Reveals Pathways of Plaque Rupture
Source: PubMed Central journal article supplement — Circ Res. 2020 Jul 30;127(8):997–1022. doi: 10.1161/CIRCRESAHA.120.317295 (PMC7508285; doi:10.1161/circresaha.120.317295), 2020-07-30
Supplement: res-127-0997-s003.pdf [file res-127-0997-s003.pdf]

## Major Resources Table

In order to allow validation and replication of experiments, all essential research materials listed in the Methods should be included in the Major Resources Table below. Authors are encouraged to use public repositories for protocols, data, code, and other materials and provide persistent identifiers and/or links to repositories when available. Authors may add or delete rows as needed.

### Animals (in vivo studies)

| Species      | Vendor or Source | Background Strain                   | Sex    | Persistent ID / URL |
|--------------|------------------|-------------------------------------|--------|---------------------|
| Mus musculus | David Dichek     | C57BL/6J <i>Apoe</i> <sup>-/-</sup> | Female |                     |
|              |                  |                                     |        |                     |
|              |                  |                                     |        |                     |

### Genetically Modified Animals

|                        | Species      | Vendor or Source       | Background Strain                   | Other Information                                                                                                | Persistent ID / URL                                                                                                                                                                                                                           |
|------------------------|--------------|------------------------|-------------------------------------|------------------------------------------------------------------------------------------------------------------|-----------------------------------------------------------------------------------------------------------------------------------------------------------------------------------------------------------------------------------------------|
| <b>Parent - Male</b>   | Mus musculus | David Dichek           | C57BL6/J <i>Apoe</i> <sup>-/-</sup> | Transgenic for macrophage-targeted urokinase-type plasminogen activator; homozygous for <i>Apoe</i> null allele. | <a href="http://www.informatics.jax.org/allele/MGI:3690133">http://www.informatics.jax.org/allele/MGI:3690133</a><br><a href="https://www.jax.org/strain/002052">https://www.jax.org/strain/002052</a><br>(source of <i>Apoe</i> null allele) |
| <b>Parent - Female</b> | Mus musculus | The Jackson Laboratory | C57BL6/J <i>Apoe</i> <sup>-/-</sup> | Homozygous for <i>Apoe</i> null allele.                                                                          | <a href="https://www.jax.org/strain/002052">https://www.jax.org/strain/002052</a><br>(source of <i>Apoe</i> null allele)                                                                                                                      |

### Antibodies

| Target antigen                     | Vendor or Source                               | Catalog #        | Working concentration | Lot # (preferred but not required) | Persistent ID / URL                                                                                                                                                                         |
|------------------------------------|------------------------------------------------|------------------|-----------------------|------------------------------------|---------------------------------------------------------------------------------------------------------------------------------------------------------------------------------------------|
| mouse laminin $\alpha$ 5           | Dr. Lydia Sorokin, Munster University, Germany | clone 504, serum | 1:1000 dilution       |                                    |                                                                                                                                                                                             |
| mouse endostatin (COL18A fragment) | Santa Cruz Biotechnology                       | sc-32720         | 1:100                 |                                    | <a href="https://www.scbt.com/p/col18a1-antibody-1837-46">https://www.scbt.com/p/col18a1-antibody-1837-46</a>                                                                               |
| COLA18A1                           | Abcam                                          | ab207162         | 1:1000                |                                    | <a href="https://www.abcam.com/endostatincol18a1-antibody-epr19995-ab207162.html">https://www.abcam.com/endostatincol18a1-antibody-epr19995-ab207162.html</a>                               |
| HSPG2                              | Abcam                                          | Ab2501           | 1:100                 |                                    | <a href="https://www.abcam.com/heparan-sulfate-proteoglycan-2perlecan-antibody-a716-ab2501.html">https://www.abcam.com/heparan-sulfate-proteoglycan-2perlecan-antibody-a716-ab2501.html</a> |
| LAMA5                              | Atlas Antibodies                               | AMAb91124        | 1:250; 1:750          |                                    | <a href="https://www.atlasantibodies.com/products/antibodies/primary-">https://www.atlasantibodies.com/products/antibodies/primary-</a>                                                     |

|                             |                              |          |              |  |                                                                                                                                                                               |
|-----------------------------|------------------------------|----------|--------------|--|-------------------------------------------------------------------------------------------------------------------------------------------------------------------------------|
|                             |                              |          |              |  | antibodies/precisa-monoclonals/lama5-antibody-amab91124/                                                                                                                      |
| HSPG2                       | Boster Biological Technology | PB9277   | 1:250; 1:750 |  | <a href="https://www.bosterbio.com/anti-hspg2-picoband-trade-antibody-pb9277-boster.html">https://www.bosterbio.com/anti-hspg2-picoband-trade-antibody-pb9277-boster.html</a> |
| rabbit IgG negative control | R&D Systems                  | AB-105-C | 1:1000       |  |                                                                                                                                                                               |
| mouse IgG negative control  | Leica Biosystems             | PA0996   | 1.7 mg/L     |  |                                                                                                                                                                               |

#### DNA/cDNA Clones

| Clone Name | Sequence | Source / Repository | Persistent ID / URL |
|------------|----------|---------------------|---------------------|
|            |          |                     |                     |
|            |          |                     |                     |
|            |          |                     |                     |

#### Cultured Cells

| Name | Vendor or Source | Sex (F, M, or unknown) | Persistent ID / URL |
|------|------------------|------------------------|---------------------|
|      |                  |                        |                     |
|      |                  |                        |                     |
|      |                  |                        |                     |

#### Data & Code Availability

| Description         | Source / Repository | Persistent ID / URL |
|---------------------|---------------------|---------------------|
| PROTOMAP mouse data | PRIDE               | PXD020406           |
| PROTOMAP human data | PRIDE               | PXD020405           |
|                     |                     |                     |

#### Other

| Description | Source / Repository | Persistent ID / URL |
|-------------|---------------------|---------------------|
|             |                     |                     |
|             |                     |                     |
|             |                     |                     |
